# Supplementary material
Source: PubMed Central journal article supplement (PMC4308561)
Supplement: NIHMS627426-supplement-Supplemental_Data_File__doc__pdf__etc__.pdf [file NIHMS627426-supplement-Supplemental_Data_File__doc__pdf__etc__.pdf]

Supplemental Table 1. Feasibility Assessment: Availability of PUCAI components (n=2503)

| <b>PUCAI Components</b>             | <b># of visits recorded</b> | <b>% of visits recorded</b> |
|-------------------------------------|-----------------------------|-----------------------------|
| Abdominal pain                      | 2478                        | 99.0%                       |
| Rectal bleeding                     | 2451                        | 97.9%                       |
| Stool consistency of most stools    | 2446                        | 97.7%                       |
| Total number of stools              | 2459                        | 98.2%                       |
| Nocturnal stools                    | 2438                        | 97.4%                       |
| Activity level                      | 2476                        | 98.9%                       |
| <b>Patients with all components</b> | <b>2402</b>                 | <b>96%</b>                  |

PUCAI = Pediatric Ulcerative Colitis Activity Index
